# Supplementary material for: γ-Radiation Induces Long-Term Dose-Related Proteomic and Phosphorylated-Tau Species Changes in Non-Human Primate Hippocampus
Source: Research Square preprint supplement (doi:10.21203/rs.3.rs-8426282/v1), 2026-01-19
Supplement: Supplementary file 1 [file 5c2d73f5a2b96c6538dd7752.docx]

**Table 1. Neurodegeneration Associated Proteins Identified in MS-based Proteomics Data**

|  | **4 Gy vs Control** | | **8 Gy vs Control** | | **8 Gy vs 4 Gy** | |
| --- | --- | --- | --- | --- | --- | --- |
| ***p* value** | **Log2 Fold Change** | ***p* value** | **Log2 Fold Change** | ***p* value** | **Log2 Fold Change** |
| **APP** | 0.161 | 0.07 | 0.073 | 0.13 | 0.824 | 0.06 |
| **MAPT** | 0.103 | 0.09 | ***0.025*** | 0.10 | 0.610 | 0.01 |
| **SNCA** | 0.949 | 0.02 | 0.401 | 0.15 | 0.272 | 0.13 |
| **TARDBP** | 0.921 | 0.08 | 0.552 | -0.05 | 0.359 | -0.13 |
| **GFAP** | 0.249 | -0.20 | 0.283 | -0.18 | 1 | 0.02 |
| **AIF1** | 0.966 | -0.03 | 0.968 | -0.07 | 0.881 | -0.04 |
