# Supplementary material for: γ-Radiation Induces Long-Term Dose-Related Proteomic and Phosphorylated-Tau Species Changes in Non-Human Primate Hippocampus
Source: Research Square preprint supplement (doi:10.21203/rs.3.rs-8426282/v1), 2026-01-19
Supplement: Supplementary file 2 [file 9e4f5988f3a226b31dcf3670.xlsx]

## Sheet: A. Molecular Function
		Term	Count	%	PValue	Genes	List Total	Pop Hits	Pop Total	Fold Enrichment	Bonferroni	Benjamini	FDR
Molecular Function	4vC	actin filament binding	6	8.10811	0.000809568	MYO1B, FSCN1, IQGAP2, PPP1R9A, DBN1, PPP1R9B	58	230	17928	8.06357	0.0822672	0.0858142	0.0858142
		glutamate-gated calcium ion channel activity	2	2.7027	0.0157979	GRIN2A, GRIN2B	58	5	17928	123.641	0.815101	0.779036	0.779036
		NMDA glutamate receptor activity	2	2.7027	0.0220482	GRIN2A, GRIN2B	58	7	17928	88.3153	0.905887	0.779036	0.779036
		small GTPase binding	4	5.40541	0.0425679	RPH3A, RAB34, CDC42EP4, IQGAP2	58	244	17928	5.06727	0.990059	1	1
	8vC	cadherin binding	4	2.96296	0.0202694	ACVR1, BMPR2, CDH13, CTNNAL1	123	85	17928	6.85911	0.99251	1	1
		oxygen sensor activity	2	1.48148	0.0202775	EGLN2	123	3	17928	97.1707	0.992525	1	1
		peptidyl-proline 4-dioxygenase activity	2	1.48148	0.0269456	EGLN2	123	4	17928	72.878	0.998539	1	1
		adenylate cyclase inhibiting G protein-coupled glutamate receptor activity	2	1.48148	0.0335687	GRM4, GRIK3	123	5	17928	58.3024	0.999714	1	1
		activin receptor activity, type I	2	1.48148	0.0335687	ACVR1, ACVR1C	123	5	17928	58.3024	0.999714	1	1
		apolipoprotein binding	2	1.48148	0.0466811	LPL, LRP8	123	7	17928	41.6446	0.999989	1	1
	8v4	RNA binding	9	9.27835	0.0120917	MTHFSD, DHX9, PES1, HNRNPH3, HNRNPC, MRPL24, TRIM32, LARP1B	79	712	17928	2.86858	0.875105	0.866756	0.866756
		actin filament binding	5	5.15464	0.01798	CNN1, TAGLN, MICALL1, MYO5A, CTNNAL1	79	230	17928	4.93341	0.955066	0.866756	0.866756
		calmodulin binding	4	4.12371	0.0183366	CNN1, CAMK2D, CALD1, CAMK2G	79	128	17928	7.09177	0.957772	0.866756	0.866756
		RNA polymerase II-specific DNA-binding transcription factor binding	4	4.12371	0.020275	DHX9, HNF4A, RBBP8, TEAD3	79	133	17928	6.82516	0.969883	0.866756	0.866756

## Sheet: B. Cellular Component
		Term	Count	%	PValue	Genes	List Total	Pop Hits	Pop Total	Fold Enrichment	Bonferroni	Benjamini	FDR
Cellular Component	4vC	filopodium	5	6.75676	4.67019e-05	MYO1B, FSCN1, IQGAP2, PPP1R9A, PPP1R9B	70	57	19768	24.7719	0.00642429	0.00644487	0.00597785
		synaptic vesicle	5	6.75676	0.000254177	SYNPR, GRIN2A, PRRT2, PPT1, SEPTIN6	70	88	19768	16.0455	0.0344727	0.0175382	0.0162673
		neuron projection	6	8.10811	0.00240658	RPH3A, GRIN2A, CPNE5, STMN1, FAM107A, CACNA1H	70	267	19768	6.34607	0.282877	0.0833425	0.0773032
		organelle membrane	3	4.05405	0.00241572	GRIN2A, ATP8A1, GRIN2B	70	21	19768	40.3429	0.283784	0.0833425	0.0773032
		actin cytoskeleton	5	6.75676	0.00526514	MYO1B, CDC42EP4, FSCN1, PPP1R9A, PPP1R9B	70	200	19768	7.06	0.517372	0.145318	0.134788
		calprotectin complex	2	2.7027	0.00696897	S100A9, S100A8	70	2	19768	282.4	0.619049	0.160286	0.148671
		dendrite	5	6.75676	0.0110575	SMO, PPT1, PPP1R9A, DBN1, PPP1R9B	70	248	19768	5.69355	0.784423	0.172081	0.159612
		lamellipodium	4	5.40541	0.0122295	FSCN1, IQGAP2, DBN1, PPP1R9B	70	137	19768	8.24526	0.816966	0.172081	0.159612
		postsynaptic membrane	4	5.40541	0.0129608	RPH3A, GRIN2A, GRIN2B, DBN1	70	140	19768	8.06857	0.834748	0.172081	0.159612
		cortical actin cytoskeleton	3	4.05405	0.0137122	PPP1R9A, DBN1, PPP1R9B	70	51	19768	16.6118	0.851234	0.172081	0.159612
		postsynaptic density	4	5.40541	0.0137166	NETO1, PPP1R9A, DBN1, PPP1R9B	70	143	19768	7.8993	0.851326	0.172081	0.159612
		microvillus	3	4.05405	0.016936	MYO1B, FSCN1, IQGAP2	70	57	19768	14.8632	0.905314	0.194764	0.180651
		glutamatergic synapse	5	6.75676	0.0192553	GRIN2A, PRRT2, NETO1, ERC2, DBN1	70	293	19768	4.81911	0.931652	0.204402	0.18959
		postsynaptic density membrane	3	4.05405	0.0255601	GRIN2A, NETO1, GRIN2B	70	71	19768	11.9324	0.971933	0.251949	0.233692
		NMDA selective glutamate receptor complex	2	2.7027	0.02759	GRIN2A, GRIN2B	70	8	19768	70.6	0.978952	0.253828	0.235434
		cytoplasm	22	29.7297	0.0382406	MEF2C, FAM107A, ASAP2, PPP1R9A, IQGAP2, AKAP3, MLF1, DDN, PPP1R9B, MTHFSD, MYO1B, ACTR1B, CDC42EP4, STMN1, CCDC181, FSCN1, EIF4EBP3, S100A9, TRIM32, CYTH1, TGM3, S100A8	70	4113	19768	1.51053	0.995396	0.329825	0.305925
	8vC	caveola	5	3.7037	0.000483532	BMPR2, CAVIN1, CDH13, LRP8, MAPK3	123	59	19768	13.62	0.0793764	0.0826841	0.0822005
		presynaptic membrane	5	3.7037	0.00152122	GRIN2A, PRRT2, CNTN6, GRIK3, KCNJ3	123	80	19768	10.0447	0.2292	0.130064	0.129304
		plasma membrane	38	28.1481	0.00238793	DPP10, BMPR2, TES, CPNE5, ARHGEF25, CHRM5, GRIK3, LPL, LRP8, SLC5A5, GRIN2A, GRM4, ACVR1C, HTR7, KCNT2, CALD1, SIRPA, LZTS2, CYTH1, KCNJ3, PLS1, ACVR1, CR2, ACE, CNTN6, COG3, PAWR, TTC7A, ARHGAP45, EEPD1, GAP43, MYO1B, LRATD2, ADGRB3, APLNR, CDH13, CNTN4, DDR2	123	3825	19768	1.59665	0.335569	0.136112	0.135316
		postsynaptic density membrane	4	2.96296	0.00966305	GRIN2A, ADGRB3, GRIK3, SHISA6	123	71	19768	9.05439	0.80994	0.332613	0.330668
		glutamatergic synapse	7	5.18519	0.00972553	TANC1, GRIN2A, CALB1, PRRT2, GRIK3, SYN3, MAPK3	123	293	19768	3.83962	0.81198	0.332613	0.330668
		mitochondrial outer membrane	5	3.7037	0.0143418	MAVS, GK, TOMM34, MGARP, BOK	123	151	19768	5.3217	0.915432	0.356976	0.354888
		dendrite	6	4.44444	0.0189157	TANC1, GAP43, BMPR2, CALB1, HTR7, CHRM5	123	248	19768	3.88828	0.961825	0.356976	0.354888
		Z disc	4	2.96296	0.0204687	BAG3, TGFB1I1, FHL2, PDLIM4	123	94	19768	6.83896	0.970884	0.356976	0.354888
		neuronal cell body	5	3.7037	0.0207834	SLC12A2, TANC1, CALB1, CPNE5, SERPINI1	123	169	19768	4.75489	0.97244	0.356976	0.354888
		focal adhesion	5	3.7037	0.024575	TES, TGFB1I1, PIK3R2, LPP, MAPK3	123	178	19768	4.51448	0.985804	0.356976	0.354888
		extracellular space	18	13.3333	0.0247449	COLEC12, CR2, ACE, LUM, COL14A1, BGN, LPL, AEBP1, LRP8, DCN, ASPN, F7, PCSK1N, SST, COL6A3, CDH13, SERPINI1, FMOD	123	1648	19768	1.75539	0.986221	0.356976	0.354888
		neuron projection	6	4.44444	0.0250509	SLC12A2, CAMK2D, GRIN2A, CPNE5, STMN1, CDH13	123	267	19768	3.61158	0.986941	0.356976	0.354888
		receptor complex	5	3.7037	0.0273207	CR2, BMPR2, PRLR, LRP8, DDR2	123	184	19768	4.36727	0.991234	0.359372	0.35727
		activin receptor complex	2	1.48148	0.0364674	ACVR1, ACVR1C	123	6	19768	53.5718	0.998258	0.445424	0.442819
		collagen trimer	3	2.22222	0.0395767	COLEC12, COL14A1, COL6A3	123	51	19768	9.45385	0.998997	0.451174	0.448536
	8v4	actin cytoskeleton	8	8.24742	3.59013e-05	CNN1, TAGLN, CALD1, DHX9, MICALL1, MYO5A, HNRNPC, DDR2	91	200	19768	8.68923	0.00537082	0.0053852	0.0053852
		late endosome	4	4.12371	0.0128857	SMO, MICALL1, MYO5A, MAPK3	91	107	19768	8.12078	0.857073	0.96643	0.96643
		organelle	2	2.06186	0.0358536	CAMK2D, CAMK2G	91	8	19768	54.3077	0.995817	1	1
		focal adhesion	4	4.12371	0.0477463	CNN1, TES, LIMS2, MAPK3	91	178	19768	4.88159	0.99935	1	1

## Sheet: C. Biological Process
		Term	Count	%	PValue	Genes	List Total	Pop Hits	Pop Total	Fold Enrichment	Bonferroni	Benjamini	FDR
Biological Process	4vC	actin filament organization	5	6.75676	0.00160668	MYO1B, RHOT2, PPP1R9A, DBN1, PPP1R9B	66	142	18374	9.8026	0.460688	0.616965	0.616965
		regulation of calcium-dependent activation of synaptic vesicle fusion	2	2.7027	0.00706289	PRRT2, ERC2	66	2	18374	278.394	0.934242	0.76614	0.76614
		neutrophil aggregation	2	2.7027	0.00706289	S100A9, S100A8	66	2	18374	278.394	0.934242	0.76614	0.76614
		actin filament bundle assembly	3	4.05405	0.00798063	MYO1B, FAM107A, FSCN1	66	38	18374	21.9785	0.953896	0.76614	0.76614
		mitochondrial respiratory chain complex I assembly	3	4.05405	0.0167846	NDUFB3, NDUFAF5, ND2	66	56	18374	14.914	0.998497	0.941028	0.941028
		calcium ion transmembrane import into cytosol	2	2.7027	0.0175652	GRIN2A, GRIN2B	66	5	18374	111.358	0.998892	0.941028	0.941028
		regulation of actin cytoskeleton organization	3	4.05405	0.017935	FAM107A, FSCN1, IQGAP2	66	58	18374	14.3997	0.999041	0.941028	0.941028
		autophagy	3	4.05405	0.0235075	COG3, S100A9, S100A8	66	67	18374	12.4654	0.999892	0.941028	0.941028
		calcium-mediated signaling	3	4.05405	0.0241654	APLNR, PPP1R9A, PPP1R9B	66	68	18374	12.2821	0.999917	0.941028	0.941028
		leukocyte migration involved in inflammatory response	2	2.7027	0.0245059	S100A9, S100A8	66	7	18374	79.5411	0.999927	0.941028	0.941028
		neuron projection development	3	4.05405	0.0289779	STMN1, PPP1R9A, PPP1R9B	66	75	18374	11.1358	0.999988	1	1
		astrocyte development	2	2.7027	0.0348266	S100A9, S100A8	66	10	18374	55.6788	0.999999	1	1
		response to ethanol	2	2.7027	0.0348266	GRIN2A, GRIN2B	66	10	18374	55.6788	0.999999	1	1
	8vC	proteasomal protein catabolic process	3	2.22222	0.00780523	DERL2, NR1D1, RNF41	124	20	18374	22.2266	0.995819	1	1
		ventricular septum morphogenesis	3	2.22222	0.0120586	ACVR1, BMPR2, APLNR	124	25	18374	17.7813	0.999792	1	1
		low-density lipoprotein particle mediated signaling	2	1.48148	0.0199497	CDH13, LPL	124	3	18374	98.7849	0.999999	1	1
		cellular response to growth factor stimulus	3	2.22222	0.021686	ACVR1, BMPR2, ACVR1C	124	34	18374	13.0745	1	1	1
		positive regulation of bone mineralization	3	2.22222	0.021686	ACVR1, BMPR2, SLC20A2	124	34	18374	13.0745	1	1	1
		positive regulation of protein import into nucleus	3	2.22222	0.022901	MAVS, BAG3, PIK3R2	124	35	18374	12.7009	1	1	1
		venous blood vessel development	2	1.48148	0.0265114	BMPR2, APLNR	124	4	18374	74.0887	1	1	1
		actin filament bundle assembly	3	2.22222	0.0267093	MYO1B, CALD1, PLS1	124	38	18374	11.6982	1	1	1
		positive regulation of protein localization to plasma membrane	3	2.22222	0.033576	DPP10, ARHGEF16, PLS1	124	43	18374	10.338	1	1	1
		positive regulation of positive chemotaxis	2	1.48148	0.0395045	F7, CDH13	124	6	18374	49.3925	1	1	1
		post-Golgi vesicle-mediated transport	2	1.48148	0.0395045	MYO1B, SORCS1	124	6	18374	49.3925	1	1	1
	8v4	negative regulation of fibroblast proliferation	3	3.09278	0.00479591	LZTS2, IFI30, TRIM32	84	23	18374	28.5311	0.904711	1	1
		actin filament organization	4	4.12371	0.0265066	CNN1, TAGLN, TMOD2, MYO5A	84	142	18374	6.16164	0.999998	1	1
